# Supplementary material for: Clinical Phenotype and Contagiousness of Early Breakthrough SARS-CoV-2 Infections after BNT162b2 COVID-19 mRNA Vaccine: A Parallel Cohort Study in Healthcare Workers
Source: MDPI journal article supplement (doi:10.3390/vaccines9121377), 2021-11-23
Supplement: s1 [file s1]

# Supplementary Material

**Table S1.** Demographic, clinical, and virological features of the study population

|                                                      | HCWs undergoing at least one BNT162b2 dose (n=6800) | HCWs resulting SARS-CoV-2 positive after at least one BNT162b2 dose (n=55) | SARS-CoV-2 positive unvaccinated controls (n=110) |
|------------------------------------------------------|-----------------------------------------------------|----------------------------------------------------------------------------|---------------------------------------------------|
| Age, years                                           | 52 (29-59)                                          | 49 (31-56)                                                                 | 49 (31-56)                                        |
| Male, n                                              | 2659 (39.1%)                                        | 12 (21.8%)                                                                 | 24 (21.8%)                                        |
| Caucasian, n                                         | 6144 (90.3%)                                        | 51 (92.7%)                                                                 | 102 (92.7%)                                       |
| Comorbidities/subject, n                             | Not available                                       | 0 (0-1)                                                                    | 0 (0-1)                                           |
| SARS-CoV-2 positive contacts, n                      | Not available                                       |                                                                            | Not available                                     |
| Previous or concomitant positive household           |                                                     | 25 (45.4%)                                                                 |                                                   |
| Previous or concomitant positive colleague           |                                                     | 7 (12.7%)                                                                  |                                                   |
| No previous nor concomitant known positive contact   |                                                     | 23 (41.8%)                                                                 |                                                   |
| Health mansion, n                                    | Not available                                       |                                                                            | NA                                                |
| Doctor                                               |                                                     | 9 (16.4%) <sup>1</sup>                                                     |                                                   |
| Nurse                                                |                                                     | 22 (40.0%) <sup>1</sup>                                                    |                                                   |
| Care provider                                        |                                                     | 14 (25.4%) <sup>1</sup>                                                    |                                                   |
| Administrative                                       |                                                     | 4 (7.3%)                                                                   |                                                   |
| Other <sup>o</sup>                                   |                                                     | 6 (10.9%) <sup>1</sup>                                                     |                                                   |
| Asymptomatic infections, n                           | NA                                                  | 18 (32.7%)                                                                 | 10 (9.1%)                                         |
| Signs and Symptoms, n*                               | NA                                                  |                                                                            |                                                   |
| Fever                                                |                                                     | 10 (18.2%)                                                                 | 57 (51.8%)                                        |
| Cough                                                |                                                     | 19 (34.5%)                                                                 | 31 (28.2%)                                        |
| Rhinorrhea                                           |                                                     | 10 (18.2%)                                                                 | 14 (12.7%)                                        |
| Pharyngitis                                          |                                                     | 7 (12.7%)                                                                  | 16 (14.5%)                                        |
| Dyspnea                                              |                                                     | 2 (3.6%)                                                                   | 15 (13.6%)                                        |
| O/G dysfunction                                      |                                                     | 7 (12.7%)                                                                  | 59 (53.6%)                                        |
| Headache                                             |                                                     | 17 (30.9%)                                                                 | 42 (38.2%)                                        |
| Arthromyalgia                                        |                                                     | 10 (18.2%)                                                                 | 51 (46.4%)                                        |
| Asthenia/Malaise                                     |                                                     | 9 (16.4%)                                                                  | 53 (48.2%)                                        |
| Nausea/Vomiting                                      |                                                     | 4 (7.2%)                                                                   | 11 (10.0%)                                        |
| Diarrhea                                             |                                                     | 3 (5.4%)                                                                   | 15 (13.6%)                                        |
| Number of signs and symptoms, n*                     | NA                                                  | 3 (2-3)                                                                    | 4 (3-5)                                           |
| Severe COVID-19, n                                   | NA                                                  |                                                                            |                                                   |
| Hospitalization                                      |                                                     | 1 (1.8%)                                                                   | 5 (4.5%)                                          |
| Oxygen support                                       |                                                     | 1 (1.8%)                                                                   | 5 (4.5%)                                          |
| Sequelae                                             |                                                     | 4 (7.2%)                                                                   | 20 (18.2%)                                        |
| Duration of symptoms, days*                          | NA                                                  | 8 (5-17)                                                                   | 11 (7-20)                                         |
| Time since COVID-19 onset and swab collection, days* | NA                                                  | 2 (1-3)                                                                    | 3 (2-6)                                           |
| PCR Cycle threshold                                  | NA                                                  | 29.7 (22.1-34.5)                                                           | 22.5 (19.5-30.5)                                  |

\*In symptomatic subjects only. <sup>1</sup>The overall 51 HCWs attending clinical wards resulted from 40 single positive cases within their respective wards, 1 cluster of 4 cases within the same ward (emergency department), 1 cluster of 3 cases (orthopedics and traumatology unit) and 2 cluster of 2 cases (dietology unit and COVID-19 unit) from three out of the four included hospitals. <sup>o</sup>Other included biologist/lab personnel, social assistant, dietitian, technician. Legend: HCWs, health care workers; NA, not applicable; O/G dysfunction, olfactory and/or gustatory dysfunction; COVID-19, novel coronavirus disease 2019; PCR, polymerase chain reaction.

**Table S2.** Comparison of demographic, clinical and virological features of post-first dose SARS-CoV-2-positive healthcare workers and corresponding age- and sex-matched unvaccinated controls

| Parameter                                            | Post-first dose HCWs<br>(n=20) | Unvaccinated controls<br>(n=40) | P     |
|------------------------------------------------------|--------------------------------|---------------------------------|-------|
| Age, years                                           | 44 (26-54)                     | 44 (26-54)                      | 1.00  |
| Male, n                                              | 5 (25.0%)                      | 10 (25.0%)                      | 1.00  |
| Caucasian, n                                         | 18 (90.0%)                     | 37 (92.5%)                      | 0.999 |
| Comorbidities, n                                     | 0 (0-0)                        | 0 (0-1)                         | 0.932 |
| Asymptomatic infections, n                           | 5 (25.0%)                      | 7 (17.5%)                       | 0.511 |
| Signs and Symptoms, n*                               |                                |                                 |       |
| Fever                                                | 6 (40.0%)                      | 17 (51.5%)                      | 0.668 |
| Cough                                                | 10 (66.7%)                     | 13 (39.4%)                      | 0.149 |
| Rhinorrhea                                           | 3 (20.0%)                      | 6 (18.2%)                       | 0.803 |
| Pharyngitis                                          | 2 (13.3%)                      | 5 (15.1%)                       | 0.783 |
| Dyspnea                                              | 1 (6.7%)                       | 3 (9.1%)                        | 0.779 |
| O/G dysfunction                                      | 4 (26.7%)                      | 17 (51.5%)                      | 0.195 |
| Headache                                             | 6 (40.0%)                      | 13 (39.4%)                      | 0.781 |
| Arthromyalgia                                        | 7 (46.7%)                      | 15 (45.4%)                      | 0.814 |
| Asthenia/Malaise                                     | 5 (33.3%)                      | 15 (45.4%)                      | 0.636 |
| Nausea/Vomiting                                      | 2 (13.3%)                      | 3 (9.1%)                        | 0.949 |
| Diarrhea                                             | 1 (6.7%)                       | 4 (12.1%)                       | 0.949 |
| Number of signs and symptoms, n*                     | 4 (2-5)                        | 5 (2-6)                         | 0.694 |
| Severe COVID-19, n                                   |                                |                                 |       |
| Hospitalization                                      | 1 (5.0%)                       | 2 (5.0%)                        | 1.00  |
| Oxygen support                                       | 1 (5.0%)                       | 2 (5.0%)                        | 1.00  |
| Sequelae                                             | 1 (5.0%)                       | 5 (12.5%)                       | 0.181 |
| Duration of symptoms, days*                          | 7 (3-18)                       | 7 (5-22)                        | 0.811 |
| Time since COVID-19 onset and swab collection, days* | 2 (2-3)                        | 2 (1-3)                         | 0.738 |
| PCR Cycle threshold                                  | 24.4 (20.9-30.5)               | 22.0 (18.6-29.9)                | 0.678 |

\*In symptomatic subjects only. Legend: HCWs, health care workers; O/G dysfunction, olfactory and/or gustatory dysfunction; COVID-19, novel coronavirus disease 2019; PCR, polymerase chain reaction.
